# Supplementary material for: Structural Properties and Magnetic Ground States of 100 Binary d-Metal Oxides Studied by Hybrid Density Functional Methods
Source: MDPI journal article supplement (doi:10.3390/molecules27030874), 2022-01-27
Supplement: s1 [file s1]

Supporting Information for

## **Structural properties and magnetic ground states of 100 binary *d*-metal oxides studied by hybrid density functional methods**

Mikhail S. Kuklin, Kim Eklund, Jarno Linnera, Artturi Ropponen, Nikolas Tolvanen, and Antti J. Karttunen\*

Department of Chemistry and Materials Science, Aalto University, 00076 Aalto, Finland.  
Email: [antti.j.karttunen@iki.fi](mailto:antti.j.karttunen@iki.fi).

### **Contents**

**Table S1.** Summary of the studied binary *d*-metal oxides.

**Table S2.** Lattice parameters of the studied binary *d*-metal oxides.

**Table S3.** Energy comparisons of different magnetic configurations for the paramagnetic binary *d*-metal oxides.

References for Supporting Information

**Table S1.** Summary of the studied binary *d*-metal oxides.

| <i>d</i> -metal | Oxide                          | ICSD code <sup>a</sup> | Polymorph/Mineral                                                      | Space group                        | Space group for magnetic ground state | Pearson symbol | Oxidation state of the metal | Band gap (DFT-PBE0/TZVP) | Magnetic ground state (DFT-PBE0/TZVP) <sup>d</sup> | <i>k</i> -mesh      |
|-----------------|--------------------------------|------------------------|------------------------------------------------------------------------|------------------------------------|---------------------------------------|----------------|------------------------------|--------------------------|----------------------------------------------------|---------------------|
| Sc              | Sc <sub>2</sub> O <sub>3</sub> | 26942                  | Kangite (impure)                                                       | <i>Ia</i> -3 (206)                 |                                       | <i>cI</i> 80   | III                          | 6.3                      | DM                                                 | 4×4×4               |
| Y               | Y <sub>2</sub> O <sub>3</sub>  | 82420                  | Yttriaite-(Y)                                                          | <i>Ia</i> -3 (206)                 |                                       | <i>cI</i> 80   | III                          | 6.5                      | DM                                                 | 4×4×4               |
| La              | La <sub>2</sub> O <sub>3</sub> | 641600                 | C-La <sub>2</sub> O <sub>3</sub>                                       | <i>Ia</i> -3 (206)                 |                                       | <i>cI</i> 80   | III                          | 5.8                      | DM                                                 | 4×4×4               |
|                 | La <sub>2</sub> O <sub>3</sub> | 100204                 | A-La <sub>2</sub> O <sub>3</sub>                                       | <i>P</i> -3m1 (164)                |                                       | <i>hP</i> 5    | III                          | 6.0                      | DM                                                 | 12×12×6             |
| Ti              | TiO                            | 196273                 | ε-TiO                                                                  | <i>P</i> -62m (189)                |                                       | <i>hP</i> 6    | II                           | -                        | DM                                                 | 6×6×10 <sup>e</sup> |
|                 | Ti <sub>2</sub> O <sub>3</sub> | 9646                   | Tistarite                                                              | <i>R</i> -3c (167)                 | <i>R</i> 3c (161)                     | <i>hR</i> 10   | III                          | 2.7                      | AFM                                                | 8×8×8               |
|                 | TiO <sub>2</sub>               | 202240                 | Rutile                                                                 | <i>P</i> 4 <sub>2</sub> /mnm (136) |                                       | <i>tP</i> 6    | IV                           | 3.9                      | DM                                                 | 8×8×12              |
|                 | TiO <sub>2</sub>               | 63711                  | Anatase                                                                | <i>I</i> 4 <sub>1</sub> /amd (141) |                                       | <i>tI</i> 12   | IV                           | 4.1                      | DM                                                 | 8×8×8               |
|                 | TiO <sub>2</sub>               | 36408                  | Brookite                                                               | <i>Pbca</i> (61)                   |                                       | <i>oP</i> 24   | IV                           | 4.4                      | DM                                                 | 4×8×8               |
|                 | Ti <sub>3</sub> O <sub>5</sub> | 50984                  | α-Ti <sub>3</sub> O <sub>5</sub>                                       | <i>Cmcm</i> (63)                   | <i>Cm</i> (8)                         | <i>oS</i> 32   | III/IV                       | 2.0                      | AFM                                                | 8×8×4               |
|                 | Ti <sub>3</sub> O <sub>5</sub> | 26492                  | β-Ti <sub>3</sub> O <sub>5</sub>                                       | <i>C</i> 2/m (12)                  | <i>Cm</i> (8)                         | <i>mS</i> 32   | III/IV                       | 1.3                      | AFM                                                | 8×8×4               |
|                 | Ti <sub>3</sub> O <sub>5</sub> | 194464                 | γ-Ti <sub>3</sub> O <sub>5</sub>                                       | <i>C</i> 2/c (15)                  | <i>P</i> 1 (1)                        | <i>mS</i> 32   | III/IV                       | 2.3                      | AFM                                                | 8×8×6               |
|                 | Ti <sub>3</sub> O <sub>5</sub> | 194465                 | δ-Ti <sub>3</sub> O <sub>5</sub>                                       | <i>P</i> 2/a (13)                  | <i>P</i> -1 (2)                       | <i>mS</i> 32   | III/IV                       | 2.4                      | AFM                                                | 8×6×4               |
|                 | Ti <sub>3</sub> O <sub>5</sub> |                        | λ-Ti <sub>3</sub> O <sub>5</sub>                                       | <i>C</i> 2/m (12)                  | <i>Cm</i> (8)                         | <i>mS</i> 32   | III/IV                       | 1.7                      | AFM                                                | 8×8×4               |
| Zr              | ZrO <sub>2</sub>               | 82543                  | Baddeleyite                                                            | <i>P</i> 2 <sub>1</sub> /c (14)    |                                       | <i>mP</i> 12   | IV                           | 5.8                      | DM                                                 | 8×8×8               |
|                 | ZrO <sub>2</sub>               | 23928                  |                                                                        | <i>P</i> 4 <sub>2</sub> /nmc (137) |                                       | <i>tP</i> 6    | IV                           | 6.1                      | DM                                                 | 12×12×8             |
| Hf              | HfO <sub>2</sub>               | 27313                  |                                                                        | <i>P</i> 2 <sub>1</sub> /c (14)    |                                       | <i>mP</i> 12   | IV                           | 6.6                      | DM                                                 | 8×8×8               |
| V               | V <sub>2</sub> O <sub>3</sub>  | 201106                 | Corundum/Karelianite                                                   | <i>R</i> -3c (167)                 | <i>R</i> 3c (161)                     | <i>hR</i> 10   | III                          | 3.0                      | AFM                                                | 8×8×8               |
|                 | V <sub>2</sub> O <sub>3</sub>  | 6286                   | Karelianite                                                            | <i>C</i> 2/c (15)                  | <i>P</i> 2/c (13)                     | <i>mS</i> 20   | III                          | 2.8                      | AFM                                                | 8×8×6               |
|                 | VO <sub>2</sub>                | 74705                  | Paramontroseite                                                        | <i>P</i> 2 <sub>1</sub> /c (14)    | <i>P</i> 2 <sub>1</sub> (4)           | <i>mP</i> 12   | IV                           | 3.0                      | AFM                                                | 8×8×8               |
|                 | VO <sub>2</sub>                | <sup>-b</sup>          |                                                                        | <i>C</i> 2/m (12)                  | <i>Cm</i> (8)                         | <i>mS</i> 12   | IV                           | 3.3                      | AFM                                                | 6×6×6               |
|                 | VO <sub>2</sub>                | 66665                  | Paramontroseite                                                        | <i>P</i> 4 <sub>2</sub> /mnm (136) | <i>Cmmm</i> (65)                      | <i>tP</i> 6    | IV                           | 2.8                      | AFM                                                | 8×8×12              |
|                 | V <sub>2</sub> O <sub>5</sub>  | 60767                  | α-V <sub>2</sub> O <sub>5</sub> /Shcherbinaite, Navajoite (trihydrate) | <i>Pmmn</i> (59)                   |                                       | <i>oP</i> 14   | V                            | 4.0                      | DM                                                 | 4×12×8              |
|                 | V <sub>2</sub> O <sub>5</sub>  | 80594                  | γ-V <sub>2</sub> O <sub>5</sub>                                        | <i>Pnma</i> (62)                   |                                       | <i>oP</i> 28   | V                            | 4.1                      | DM                                                 | 4×12×4              |
| Nb              | NbO                            | 14338                  |                                                                        | <i>Pm</i> -3m (221)                |                                       | <i>cP</i> 6    | II                           | -                        | DM                                                 | 8×8×8               |
|                 | NbO <sub>2</sub>               | 75197                  | Distorted rutile                                                       | <i>I</i> 4 <sub>1</sub> /a (88)    |                                       | <i>tI</i> 96   | IV                           | 2.1                      | DM                                                 | 4×4×4               |
|                 | NbO <sub>2</sub>               | 75198                  | Rutile                                                                 | <i>P</i> 4 <sub>2</sub> /mnm (136) |                                       | <i>tP</i> 6    | IV                           | -                        | DM                                                 | 8×8×12              |
|                 | Nb <sub>2</sub> O <sub>5</sub> | 71317                  | z-Nb <sub>2</sub> O <sub>5</sub>                                       | <i>C</i> 2/c (15)                  |                                       | <i>mS</i> 28   | V                            | 4.6                      | DM                                                 | 6×6×8               |
| Ta              | Ta <sub>2</sub> O <sub>5</sub> | -                      | β-Ta <sub>2</sub> O <sub>5</sub> /Tantite                              | <i>Pnma</i> (53)                   |                                       | <i>oP</i> 14   | V                            | 4.6                      | DM                                                 | 6×12×6              |
| Cr              | Cr <sub>2</sub> O <sub>3</sub> | 167268                 | Eskolaite                                                              | <i>R</i> -3c (167)                 | <i>R</i> 3c (161)                     | <i>hR</i> 10   | III                          | 5.1                      | AFM                                                | 8×8×8               |
|                 | CrO <sub>2</sub>               | 202836                 |                                                                        | <i>P</i> 4 <sub>2</sub> /mnm (136) | <i>P</i> 4 <sub>2</sub> /mnm (136)    | <i>tP</i> 6    | IV                           | -                        | FM                                                 | 8×8×12              |
|                 | CrO <sub>3</sub>               | 16031                  |                                                                        | <i>Ama</i> 2 (40)                  |                                       | <i>oS</i> 16   | VI                           | 4.3                      | DM                                                 | 8×8×8               |
| Mo              | MoO <sub>2</sub>               | 80830                  | Tugarinovite                                                           | <i>P</i> 2 <sub>1</sub> /c (14)    | <i>P</i> 2 <sub>1</sub> (4)           | <i>mP</i> 12   | IV                           | -                        | AFM                                                | 8×8×8               |
|                 | MoO <sub>3</sub>               | 166363                 | α-MoO <sub>3</sub> /Molybdate                                          | <i>Pnma</i> (62)                   |                                       | <i>oP</i> 16   | VI                           | 4.2                      | DM                                                 | 2×12×12             |
| W               | WO <sub>2</sub>                | 8217                   | Distorted rutile                                                       | <i>P</i> 2 <sub>1</sub> /c (14)    | <i>P</i> 2 <sub>1</sub> (4)           | <i>mP</i> 12   | IV                           | 0.4                      | AFM                                                | 8×8×8               |
|                 | WO <sub>3</sub>                | 84843                  | ε-WO <sub>3</sub>                                                      | <i>Pc</i> (7)                      |                                       | <i>mP</i> 16   | VI                           | 3.5                      | DM                                                 | 8×8×6               |
|                 | WO <sub>3</sub>                | 80053                  | δ-WO <sub>3</sub>                                                      | <i>P</i> -1 (2)                    |                                       | <i>aP</i> 32   | VI                           | 3.4                      | DM                                                 | 6×6×6               |
|                 | WO <sub>3</sub>                | 50727                  | γ-WO <sub>3</sub> /Tungstite (hydride)                                 | <i>P</i> 2 <sub>1</sub> /c (14)    |                                       | <i>mP</i> 32   | VI                           | 3.3                      | DM                                                 | 6×6×6               |
|                 | WO <sub>3</sub>                | 50729                  | β-WO <sub>3</sub> /Krasnogorite                                        | <i>Pbcn</i> (60)                   |                                       | <i>oP</i> 32   | VI                           | 3.3                      | DM                                                 | 6×6×6               |

|    |                                |                |                                                    |                                                      |                                                      |             |        |          |     |          |
|----|--------------------------------|----------------|----------------------------------------------------|------------------------------------------------------|------------------------------------------------------|-------------|--------|----------|-----|----------|
|    | WO <sub>3</sub>                | 50732          | $\alpha$ -WO <sub>3</sub>                          | <i>P4/ncc</i> (130)                                  |                                                      | <i>tP16</i> | VI     | 2.1      | DM  | 8×8×6    |
|    | WO <sub>3</sub>                | 88367          |                                                    | <i>P4/nmm</i> (129)                                  |                                                      | <i>tP8</i>  | VI     | 2.1      | DM  | 8×8×8    |
|    | WO <sub>3</sub>                | 32001          |                                                    | <i>P6/mmm</i> (191)                                  |                                                      | <i>hP12</i> | VI     | 2.0      | DM  | 6×6×12   |
| Mn | MnO                            | 9864           | Manganosite                                        | <i>Fm-3m</i> (225)                                   | <i>R-3m</i> (166)                                    | <i>cF8</i>  | II     | 3.9      | AFM | 8×8×8    |
|    | MnO                            | 262928         |                                                    | <i>P6<sub>3</sub>mc</i> (186)                        | <i>Pmc2<sub>1</sub></i> (26)                         | <i>hP4</i>  | II     | 3.0      | AFM | 12×8×8   |
|    | Mn <sub>2</sub> O <sub>3</sub> | 24342          | Bixbyite                                           | <i>Pbca</i> (61)                                     | <i>Pbca</i> (61)                                     | <i>oP80</i> | III    | -        | AFM | 4×4×4    |
|    | Mn <sub>2</sub> O <sub>3</sub> | 9091           | Bixbyite                                           | <i>Ia-3</i> (206)                                    | <i>Ia-3</i> (206)                                    | <i>cI80</i> | III    | -        | FM  | 4×4×4    |
|    | Mn <sub>3</sub> O <sub>4</sub> | 109250         | Hausmannite                                        | <i>I4<sub>1</sub>/amd</i> (141)                      | <i>Imma</i> (74)                                     | <i>tI28</i> | II/III | 3.2      | FiM | 6×6×6    |
|    | MnO <sub>2</sub>               | 73363          | $\alpha$ -MnO <sub>2</sub> /Hollandite             | <i>I4/m</i> (87)                                     | <i>C2/m</i> (12)                                     | <i>tI24</i> | IV     | 3.4      | AFM | 6×6×4    |
|    | MnO <sub>2</sub>               | 78331          | $\gamma$ /R-MnO <sub>2</sub> /Ramsdellite          | <i>Pnam</i> (62)                                     | <i>Pmc2<sub>1</sub></i> (26)                         | <i>oP12</i> | IV     | 3.5      | AFM | 12×8×4   |
|    | MnO <sub>2</sub>               | 73716          | $\beta$ -MnO <sub>2</sub> /Pyrolusite              | <i>P4/nmm</i> (136)                                  | <i>Cmmm</i> (65)                                     | <i>tP6</i>  | IV     | 2.1      | AFM | 8×8×12   |
|    | MnO <sub>2</sub>               | 193445         | $\lambda$ -MnO <sub>2</sub>                        | <i>Fd-3m</i> (227)                                   | <i>Imma</i> (74)                                     | <i>cF48</i> | IV     | 3.7      | AFM | 8×8×8    |
|    | Mn <sub>2</sub> O <sub>7</sub> | 60821          |                                                    | <i>P2<sub>1</sub>/c</i> (14)                         |                                                      | <i>mP72</i> | VII    | 3.9      | DM  | 6×2×4 °  |
| Tc | TcO <sub>2</sub>               | 173151         |                                                    | <i>P2<sub>1</sub>/c</i> (14)                         | <i>P2<sub>1</sub></i> (4)                            | <i>mP12</i> | IV     | 2.4      | AFM | 8×8×8    |
|    | Tc <sub>2</sub> O <sub>7</sub> | 16226          |                                                    | <i>Pbca</i> (61)                                     |                                                      | <i>oP36</i> | VII    | 4.9      | DM  | 2×6×8    |
| Re | ReO <sub>2</sub>               | 647349         |                                                    | <i>P2<sub>1</sub>/c</i> (14)                         | <i>P2<sub>1</sub></i> (4)                            | <i>mP12</i> | IV     | 1.5      | AFM | 8×8×8    |
|    | ReO <sub>2</sub>               | 24060          |                                                    | <i>Pbcn</i> (60)                                     | <i>P2<sub>1</sub>2<sub>1</sub>2</i> (18)             | <i>oP12</i> | IV     | 1.6      | AFM | 8×8×8    |
|    | ReO <sub>2</sub>               | 154021         | Rutile                                             | <i>P4<sub>2</sub>/mnm</i> (136)                      | <i>Cmmm</i> (65)                                     | <i>tP6</i>  | IV     | 1.6      | AFM | 8×8×12   |
|    | ReO <sub>3</sub>               | 77679          |                                                    | <i>Pm-3m</i> (221)                                   |                                                      | <i>cP4</i>  | VI     | -        | DM  | 12×12×12 |
|    | Re <sub>2</sub> O <sub>7</sub> | 15217          |                                                    | <i>P2<sub>1</sub>2<sub>1</sub>2<sub>1</sub></i> (19) |                                                      | <i>oP72</i> | VII    | 4.8      | DM  | 2×2×8    |
| Fe | Fe <sub>3</sub> O <sub>4</sub> | 85806          | Magnetite                                          | <i>Fd-3m</i> (227)                                   | <i>Fd-3m</i> (227)                                   | <i>cF56</i> | II/III | -        | FiM | 8×8×8    |
|    | Fe <sub>3</sub> O <sub>4</sub> | 98088          |                                                    | <i>P2/c</i> (13)                                     | <i>P2/c</i> (13)                                     | <i>mP56</i> | II/III | 1.6      | FiM | 8×8×2    |
|    | Fe <sub>2</sub> O <sub>3</sub> | 40142          | $\alpha$ -Fe <sub>2</sub> O <sub>3</sub> /Hematite | <i>R-3c</i> (167)                                    | <i>R-3</i> (148)                                     | <i>hR10</i> | III    | 4.0      | AFM | 8×8×8    |
|    | Fe <sub>2</sub> O <sub>3</sub> | 237290         | $\beta$ -Fe <sub>2</sub> O <sub>3</sub>            | <i>Ia-3</i> (206)                                    | <i>I2<sub>1</sub>2<sub>1</sub>2<sub>1</sub></i> (24) | <i>cI80</i> | III    | 3.3      | AFM | 4×4×4    |
|    | Fe <sub>2</sub> O <sub>3</sub> | 415250         | $\epsilon$ -Fe <sub>2</sub> O <sub>3</sub>         | <i>Pna2<sub>1</sub></i> (33)                         | <i>Pna2<sub>1</sub></i> (33)                         | <i>oP40</i> | III    | 4.0, 3.8 | FiM | 8×4×4    |
| Ru | RuO <sub>2</sub>               | 15071          |                                                    | <i>P4<sub>2</sub>/mnm</i> (136)                      |                                                      | <i>tP6</i>  | IV     | -        | AFM | 8×8×12   |
|    | RuO <sub>4</sub>               | 415303         |                                                    | <i>P-43n</i> (218)                                   |                                                      | <i>cP40</i> | VIII   | 4.2      | DM  | 4×4×4    |
|    | RuO <sub>4</sub>               | 415306         |                                                    | <i>C2/c</i> (15)                                     |                                                      | <i>mS20</i> | VIII   | 4.1      | DM  | 8×8×4    |
| Os | OsO <sub>2</sub>               | 15070          |                                                    | <i>P4<sub>2</sub>/mnm</i> (136)                      |                                                      | <i>tP6</i>  | IV     | -        | DM  | 8×8×12   |
|    | OsO <sub>4</sub>               | 63             |                                                    | <i>C2/c</i> (15)                                     |                                                      | <i>mS20</i> | VIII   | 5.1      | DM  | 8×8×4    |
| Co | CoO                            | 9865           |                                                    | <i>Fm3m</i> (225)                                    | <i>R-3m</i> (166)                                    | <i>cF8</i>  | II     | 4.5      | AFM | 8×8×8    |
|    | CoO                            | 43458          |                                                    | <i>P6<sub>3</sub>mc</i> (186)                        | <i>Pmc2<sub>1</sub></i> (26)                         | <i>hP4</i>  | II     | 3.2      | AFM | 12×8×8   |
|    | Co <sub>3</sub> O <sub>4</sub> | 63165          |                                                    | <i>Fd-3m</i> (227)                                   | <i>F-43m</i> (216)                                   | <i>cF56</i> | II/III | 4.0      | AFM | 6×6×6    |
| Rh | Rh <sub>2</sub> O <sub>3</sub> | 108941         | Corundum                                           | <i>R-3c</i> (167)                                    |                                                      | <i>hR10</i> | III    | 3.2      | DM  | 8×8×8    |
|    | Rh <sub>2</sub> O <sub>3</sub> | 9206           |                                                    | <i>Pbca</i> (61)                                     |                                                      | <i>oP40</i> | III    | 3.0      | DM  | 8×8×2 °  |
|    | RhO <sub>2</sub>               | 28498          | Rutile                                             | <i>P4<sub>2</sub>/mnm</i> (136)                      | <i>P4<sub>2</sub>/mnm</i> (136)                      | <i>tP6</i>  | IV     | -        | FM  | 8×8×12   |
| Ir | IrO <sub>2</sub>               | 84577          | Rutile                                             | <i>P4<sub>2</sub>/mnm</i> (136)                      | <i>Cmmm</i> (65)                                     | <i>tP6</i>  | IV     | -        | AFM | 8×8×12   |
| Ni | NiO                            | 9866           | Bunsenite                                          | <i>Fm3m</i> (225)                                    | <i>R-3m</i> (166)                                    | <i>cF8</i>  | II     | 5.2      | AFM | 8×8×8    |
| Pd | PdO                            | 24692          | Palladinite                                        | <i>P4<sub>2</sub>/mmc</i> (131)                      |                                                      | <i>tP4</i>  | II     | 1.4      | DM  | 12×12×8  |
| Pt | PtO                            | - <sup>c</sup> |                                                    | <i>P4<sub>2</sub>/mmc</i> (131)                      |                                                      | <i>tP4</i>  | II     | 1.4      | DM  | 12×12×8  |
|    | Pt <sub>3</sub> O <sub>4</sub> | 43002          |                                                    | <i>Pm-3n</i> (223)                                   |                                                      | <i>cP14</i> | II/IV  | -        | DM  | 8×8×8    |
|    | PtO <sub>2</sub>               | 24923          | $\alpha$ -PtO                                      | <i>P6<sub>3</sub>mc</i> (186)                        |                                                      | <i>hP6</i>  | IV     | 3.6      | DM  | 12×12×4  |
|    | PtO <sub>2</sub>               | 4415           | $\beta$ -PtO                                       | <i>Pnnm</i> (58)                                     |                                                      | <i>oP6</i>  | IV     | 2.5      | DM  | 8×8×12   |
| Cu | Cu <sub>2</sub> O              | 52043          | Cuprite                                            | <i>Pn-3m</i> (224)                                   |                                                      | <i>cP6</i>  | I      | 2.3      | DM  | 8×8×8    |
|    | CuO                            | 67850          | Tenorite                                           | <i>C2/c</i> (15)                                     | <i>P2<sub>1</sub>/c</i> (14)                         | <i>mS8</i>  | II     | 3.8      | AFM | 6×12×6   |
|    | Cu <sub>4</sub> O <sub>3</sub> | 100566         | Paramelaconite                                     | <i>I4<sub>1</sub>/amd</i> (141)                      | <i>Imma</i> (74)                                     | <i>tI28</i> | I/II   | 2.9      | AFM | 8×8×8    |

|    |                                |         |                            |                               |                              |             |        |     |    |          |
|----|--------------------------------|---------|----------------------------|-------------------------------|------------------------------|-------------|--------|-----|----|----------|
| Ag | Ag <sub>2</sub> O              | 174089  |                            | <i>Pn-3m</i> (224)            |                              | <i>cP6</i>  | I      | 1.7 | DM | 8×8×8    |
|    | AgO                            | 202055  |                            | <i>I4<sub>1</sub>/a</i> (88)  |                              | <i>tI32</i> | I/III  | 1.5 | DM | 6×6×6    |
|    | Ag <sub>2</sub> O <sub>3</sub> | 1509692 |                            | <i>Fdd2</i> (43)              |                              | <i>oF40</i> | III    | 2.3 | DM | 8×8×8    |
|    | Ag <sub>6</sub> O <sub>2</sub> | 26557   |                            | <i>P-31m</i> (162)            |                              | <i>hP8</i>  | 0/I    | 0.5 | DM | 8×8×8    |
|    | Ag <sub>3</sub> O <sub>4</sub> | 202218  |                            | <i>P2<sub>1</sub>/c</i> (14)  | <i>P2<sub>1</sub>/c</i> (14) | <i>mP14</i> | II/III | -   | FM | 12×4×8   |
| Au | Au <sub>2</sub> O <sub>3</sub> | 8014    |                            | <i>Fdd2</i> (43)              |                              | <i>oF40</i> | III    | 2.9 | DM | 8×8×8    |
| Zn | ZnO                            | 26170   | Zincite                    | <i>P6<sub>3</sub>mc</i> (186) |                              | <i>hP4</i>  | II     | 3.6 | DM | 12×12×8  |
|    | ZnO <sub>2</sub>               | 60763   |                            | <i>Pa-3</i> (205)             |                              | <i>cP12</i> | II     | 5.5 | DM | 8×8×8    |
| Cd | CdO                            | 29290   | Monteponite                | <i>Fm-3m</i> (225)            |                              | <i>cF8</i>  | II     | 1.4 | DM | 12×12×12 |
|    | CdO <sub>2</sub>               | 36151   |                            | <i>Pa-3</i> (205)             |                              | <i>cP12</i> | II     | 3.8 | DM | 8×8×8    |
| Hg | HgO                            | 14124   | Montroydite                | <i>Pnma</i> (62)              |                              | <i>oP8</i>  | II     | 2.9 | DM | 6×8×12   |
|    | HgO                            | 639125  |                            | <i>P3<sub>2</sub>21</i> (154) |                              | <i>hP6</i>  | II     | 2.8 | DM | 12×12×4  |
|    | HgO <sub>2</sub>               | 48214   | $\alpha$ -HgO <sub>2</sub> | <i>C2/m</i> (12)              |                              | <i>mS6</i>  | II     | 2.0 | DM | 12×12×12 |
|    | HgO <sub>2</sub>               | 24774   | $\beta$ -HgO <sub>2</sub>  | <i>Pbca</i> (61)              |                              | <i>oP12</i> | II     | 2.0 | DM | 6×6×8    |

<sup>a</sup> Code in Inorganic Crystal Structure Database (ICSD)

<sup>b</sup> Code in Crystallography Open Database is 1530870

<sup>c</sup> Code in Crystallography Open Database is 4124669

<sup>d</sup> Diamagnetic (DM), ferromagnetic (FM), ferrimagnetic (FiM), and antiferromagnetic (AFM) spin configurations

<sup>e</sup> TOLINTEG 10 10 10 10 20 was used in the CRYSTAL calculations.

**Table S2.** Optimized lattice parameters of the studied binary *d*-metal oxides. Differences to experimental values are listed in parentheses.

| <i>d</i> -metal | Oxide <sup>a</sup>                          | Pearson symbol | Lattice parameters <sup>b</sup> |                  |                   |                  |                 |                  |                  |                  |                   |                  |                 |                  |
|-----------------|---------------------------------------------|----------------|---------------------------------|------------------|-------------------|------------------|-----------------|------------------|------------------|------------------|-------------------|------------------|-----------------|------------------|
|                 |                                             |                | DFT-PBE0/SVP                    |                  |                   |                  |                 |                  | DFT-PBE0/TZVP    |                  |                   |                  |                 |                  |
|                 |                                             |                | <i>a</i> (Å)                    | <i>b</i> (Å)     | <i>c</i> (Å)      | $\alpha$ (°)     | $\beta$ (°)     | $\gamma$ (°)     | <i>a</i> (Å)     | <i>b</i> (Å)     | <i>c</i> (Å)      | $\alpha$ (°)     | $\beta$ (°)     | $\gamma$ (°)     |
| Sc              | Sc <sub>2</sub> O <sub>3</sub> <sup>1</sup> | <i>cI80</i>    | 9.824<br>(−0.3%)                |                  |                   |                  |                 |                  | 9.851<br>(0.0%)  |                  |                   |                  |                 |                  |
| Y               | Y <sub>2</sub> O <sub>3</sub> <sup>2</sup>  | <i>cI80</i>    | 10.577<br>(−0.2%)               |                  |                   |                  |                 |                  | 10.605<br>(0.1%) |                  |                   |                  |                 |                  |
| La              | La <sub>2</sub> O <sub>3</sub> <sup>3</sup> | <i>cI80</i>    | 11.430<br>(0.9%)                |                  |                   |                  |                 |                  | 11.452<br>(1.1%) |                  |                   |                  |                 |                  |
|                 | La <sub>2</sub> O <sub>3</sub> <sup>4</sup> | <i>hP5</i>     | 3.958<br>(0.5%)                 |                  | 6.177<br>(0.7%)   |                  |                 |                  | 3.964<br>(0.7%)  |                  | 6.187<br>(0.8%)   |                  |                 |                  |
| Ti              | TiO <sub>2</sub> <sup>5</sup>               | <i>hP3</i>     | 4.944<br>(−1.0%)                |                  | 2.869<br>(−0.3%)  |                  |                 |                  | 4.951<br>(−0.9%) |                  | 2.872<br>(−0.2%)  |                  |                 |                  |
|                 | Ti <sub>2</sub> O <sub>3</sub>              | <i>hR10</i>    | 5.224<br>(1.3%)                 |                  | 13.482<br>(−0.9%) |                  |                 |                  | 5.237<br>(1.6%)  |                  | 13.488<br>(−0.9%) |                  |                 |                  |
|                 | TiO <sub>2</sub> <sup>6</sup>               | <i>tP6</i>     | 4.571<br>(−0.5%)                |                  | 2.959<br>(0.0%)   |                  |                 |                  | 4.584<br>(−0.2%) |                  | 2.964<br>(0.2%)   |                  |                 |                  |
|                 | TiO <sub>2</sub> <sup>7</sup>               | <i>tI12</i>    | 3.750<br>(−0.9%)                |                  | 9.704<br>(2.0%)   |                  |                 |                  | 3.769<br>(−0.4%) |                  | 9.673<br>(1.7%)   |                  |                 |                  |
|                 | TiO <sub>2</sub> <sup>8</sup>               | <i>oP24</i>    | 9.206<br>(0.3%)                 | 5.446<br>(0.0%)  | 5.102<br>(−0.7%)  |                  |                 |                  | 9.213<br>(0.4%)  | 5.454<br>(0.1%)  | 5.128<br>(−0.2%)  |                  |                 |                  |
|                 | $\alpha$ -Ti <sub>3</sub> O <sub>5</sub>    | <i>oS32</i>    | 9.992<br>(1.5%)                 | 3.769<br>(−0.8%) | 9.981<br>(−0.1%)  |                  | 89.9<br>(−0.1%) |                  | 10.019<br>(1.8%) | 3.776<br>(−0.6%) | 10.004<br>(0.2%)  |                  | 89.9<br>(−0.1%) |                  |
|                 | $\beta$ -Ti <sub>3</sub> O <sub>5</sub>     | <i>mS32</i>    | 9.942<br>(2.0%)                 | 3.811<br>(0.2%)  | 9.510<br>(0.7%)   |                  | 91.8<br>(−0.2%) |                  | 10.040<br>(3.0%) | 3.825<br>(0.6%)  | 9.486<br>(0.5%)   |                  | 91.9<br>(0.0)   |                  |
|                 | $\gamma$ -Ti <sub>3</sub> O <sub>5</sub>    | <i>mS32</i>    | 5.161<br>(1.7%)                 | 5.728<br>(1.2%)  | 7.037<br>(−2.0%)  | 109.1<br>(−0.5%) | 90.7<br>(0.8%)  | 116.1<br>(−0.5%) | 5.174<br>(2.0%)  | 5.736<br>(1.4%)  | 7.057<br>(−1.7%)  | 109.0<br>(−0.6%) | 90.8<br>(0.8%)  | 116.1<br>(−0.4%) |
|                 | $\delta$ -Ti <sub>3</sub> O <sub>5</sub>    | <i>mS32</i>    | 5.132<br>(1.4%)                 | 7.087<br>(−1.7%) | 10.045<br>(0.8%)  | 108.5<br>(−0.8%) | 90.0<br>(0.0%)  | 90.0<br>(0.0%)   | 5.145<br>(1.7%)  | 7.108<br>(−1.4%) | 10.064<br>(1.0%)  | 108.6<br>(−0.6%) | 90.0<br>(0.0%)  | 90.0<br>(0.0%)   |
|                 | $\lambda$ -Ti <sub>3</sub> O <sub>5</sub>   | <i>mS32</i>    | 9.883<br>(0.5%)                 | 3.776<br>(−0.5%) | 10.089<br>(1.0%)  |                  | 89.7<br>(−1.4%) |                  | 9.913<br>(0.8%)  | 3.780<br>(−0.3%) | 10.019<br>(1.3%)  |                  | 89.6<br>(−1.5%) |                  |
| Zr              | ZrO <sub>2</sub> <sup>9</sup>               | <i>mP12</i>    | 5.154<br>(0.2%)                 | 5.231<br>(0.4%)  | 5.302<br>(−0.2%)  |                  | 99.0<br>(−0.2%) |                  | 5.169<br>(0.5%)  | 5.226<br>(0.3%)  | 5.327<br>(0.3%)   |                  | 99.0<br>(−0.2%) |                  |
|                 | ZrO <sub>2</sub> <sup>10</sup>              | <i>tP6</i>     | 3.599<br>(−1.1%)                |                  | 5.157<br>(−2.1%)  |                  |                 |                  | 3.602<br>(−1.0)  |                  | 5.170<br>(−1.9%)  |                  |                 |                  |
| Hf              | HfO <sub>2</sub> <sup>11</sup>              | <i>mP12</i>    | 5.175<br>(1.2%)                 | 5.205<br>(0.6%)  | 5.338<br>(0.8%)   |                  | 99.1<br>(−0.1%) |                  | 5.127<br>(0.3%)  | 5.235<br>(1.2%)  | 5.244<br>(−1.0%)  |                  | 98.4<br>(−0.7%) |                  |
| V               | V <sub>2</sub> O <sub>3</sub>               | <i>hR10</i>    | 5.046<br>(1.9%)                 |                  | 13.786<br>(−1.5%) |                  |                 |                  | 5.053<br>(2.0%)  |                  | 13.821<br>(−1.3%) |                  |                 |                  |
|                 | V <sub>2</sub> O <sub>3</sub>               | <i>mS20</i>    | 5.499<br>(−0.9%)                | 5.070<br>(1.4%)  | 7.295<br>(0.6%)   |                  | 95.7<br>(−1.1%) |                  | 5.509<br>(−0.7%) | 5.079<br>(1.5%)  | 7.309<br>(0.8%)   |                  | 95.7<br>(−1.0%) |                  |
|                 | VO <sub>2</sub>                             | <i>mP12</i>    | 5.376<br>(0.1%)                 | 4.453<br>(0.0%)  | 5.357<br>(0.0%)   |                  | 112.0<br>(0.0%) |                  | 5.372<br>(0.0%)  | 4.457<br>(0.1%)  | 5.361<br>(0.0%)   |                  | 112.0<br>(0.1%) |                  |

|    |                                              |             |                   |                  |                   |                |                  |                 |                   |                  |                   |                |                  |                 |
|----|----------------------------------------------|-------------|-------------------|------------------|-------------------|----------------|------------------|-----------------|-------------------|------------------|-------------------|----------------|------------------|-----------------|
|    | VO <sub>2</sub>                              | <i>mS12</i> | 12.077<br>(0.4%)  | 3.754<br>(1.6%)  | 6.332<br>(-1.4%)  |                | 106.1<br>(0.0%)  |                 | 12.094<br>(0.5%)  | 3.758<br>(1.8%)  | 6.347<br>(-1.1%)  |                | 106.2<br>(0.1%)  |                 |
|    | VO <sub>2</sub>                              | <i>tP6</i>  | 6.232<br>(-3.2%)  | 6.232<br>(-3.2%) | 2.998<br>(5.0%)   |                |                  |                 | 6.251<br>(-2.9%)  | 6.251<br>(-2.9%) | 3.001<br>(5.1%)   |                |                  |                 |
|    | V <sub>2</sub> O <sub>5</sub> <sup>12</sup>  | <i>oP14</i> | 11.450<br>(-0.5%) | 3.546<br>(-0.5%) | 4.478<br>(2.5%)   |                |                  |                 | 11.455<br>(-0.5%) | 3.550<br>(-0.4%) | 4.625<br>(5.9%)   |                |                  |                 |
|    | V <sub>2</sub> O <sub>5</sub> <sup>13</sup>  | <i>oP28</i> | 10.062<br>(1.2%)  | 3.563<br>(-0.6%) | 10.212<br>(1.7%)  |                |                  |                 | 10.115<br>(1.7%)  | 3.567<br>(-0.5%) | 10.503<br>(4.6%)  |                |                  |                 |
| Nb | NbO <sup>14</sup>                            | <i>cP6</i>  | 4.202<br>(-0.2%)  |                  |                   |                |                  |                 | 4.209<br>(0.0%)   |                  |                   |                |                  |                 |
|    | NbO <sub>2</sub> <sup>15</sup>               | <i>tI96</i> | 13.787<br>(0.6%)  |                  | 5.938<br>(-0.8%)  |                |                  |                 | 13.791<br>(0.6%)  |                  | 5.956<br>(-0.5%)  |                |                  |                 |
|    | NbO <sub>2</sub> <sup>15</sup>               | <i>tP6</i>  | 4.959<br>(2.3%)   |                  | 2.869<br>(-5.4%)  |                |                  |                 | 4.962<br>(2.4%)   |                  | 2.878<br>(-5.1%)  |                |                  |                 |
|    | Nb <sub>2</sub> O <sub>5</sub> <sup>16</sup> | <i>mS28</i> | 12.797<br>(0.4%)  | 4.897<br>(0.3%)  | 5.599<br>(0.7%)   |                | 105.1<br>(0.1%)  |                 | 12.821<br>(0.6%)  | 4.911<br>(0.6%)  | 5.609<br>(0.9%)   |                | 104.8<br>(-0.2%) |                 |
| Ta | Ta <sub>2</sub> O <sub>5</sub> <sup>17</sup> | <i>oP14</i> | 6.448<br>(0.4%)   | 3.770<br>(0.0%)  | 7.720<br>(0.2%)   |                |                  |                 | 6.441<br>(0.2%)   | 3.763<br>(-0.2%) | 7.691<br>(-0.2%)  |                |                  |                 |
| Cr | Cr <sub>2</sub> O <sub>3</sub>               | <i>hR10</i> | 4.965<br>(0.2%)   |                  | 13.541<br>(-0.4%) |                |                  |                 | 4.976<br>(0.4%)   |                  | 13.571<br>(-0.2%) |                |                  |                 |
|    | CrO <sub>2</sub>                             | <i>tP6</i>  | 4.359<br>(-1.4%)  |                  | 2.943<br>(0.9%)   |                |                  |                 | 4.368<br>(-1.2%)  |                  | 2.952<br>(1.2%)   |                |                  |                 |
|    | CrO <sub>3</sub>                             | <i>oS16</i> | 5.731<br>(-0.2%)  | 8.824<br>(3.1%)  | 4.781<br>(-0.2%)  |                |                  |                 | 5.748<br>(0.1%)   | 8.979<br>(4.9%)  | 4.925<br>(2.8%)   |                |                  |                 |
| Mo | MoO <sub>2</sub>                             | <i>mP12</i> | 5.552<br>(0.2%)   | 4.865<br>(0.2%)  | 5.638<br>(0.5%)   |                | 119.4<br>(0.0%)  |                 | 5.557<br>(0.3%)   | 4.866<br>(0.2%)  | 5.660<br>(0.9%)   |                | 119.6<br>(0.1%)  |                 |
|    | MoO <sub>3</sub>                             | <i>oP16</i> | 14.228<br>(2.7%)  | 3.694<br>(-0.1%) | 3.967<br>(0.1%)   |                |                  |                 | 14.477<br>(4.5%)  | 3.695<br>(0.0%)  | 3.972<br>(0.2%)   |                |                  |                 |
| W  | WO <sub>2</sub>                              | <i>mP12</i> | 5.587<br>(0.4%)   | 4.953<br>(1.2%)  | 5.581<br>(0.3%)   |                | 118.5<br>(-1.6%) |                 | 5.554<br>(-0.2%)  | 4.927<br>(0.6%)  | 5.585<br>(0.4%)   |                | 118.5<br>(-1.6%) |                 |
|    | WO <sub>3</sub> <sup>18</sup>                | <i>mP16</i> | 5.415<br>(2.6%)   | 5.430<br>(5.3%)  | 7.771<br>(1.4%)   |                | 90.0<br>(-1.9%)  |                 | 5.416<br>(2.6%)   | 5.444<br>(5.6%)  | 7.731<br>(0.9%)   |                | 90.4<br>(-1.5%)  |                 |
|    | WO <sub>3</sub> <sup>19</sup>                | <i>aP32</i> | 7.520<br>(2.8%)   | 7.757<br>(3.1%)  | 7.866<br>(2.3%)   | 90.0<br>(1.3%) | 90.0<br>(-1.0%)  | 90.0<br>(-1.1%) | 7.485<br>(2.4%)   | 7.751<br>(3.0%)  | 7.870<br>(2.4%)   | 90.0<br>(1.3%) | 90.0<br>(-1.0%)  | 90.0<br>(-1.0%) |
|    | WO <sub>3</sub> <sup>20</sup>                | <i>mP32</i> | 7.472<br>(2.0%)   | 7.741<br>(2.3%)  | 7.900<br>(2.2%)   |                | 90.0<br>(-0.5%)  |                 | 7.437<br>(1.5%)   | 7.777<br>(2.8%)  | 7.904<br>(2.3%)   |                | 90.0<br>(-0.5%)  |                 |
|    | WO <sub>3</sub> <sup>20</sup>                | <i>oP32</i> | 7.472<br>(1.8%)   | 7.741<br>(2.2%)  | 7.900<br>(2.0%)   |                |                  |                 | 7.439<br>(1.3%)   | 7.778<br>(2.7%)  | 7.903<br>(2.0%)   |                |                  |                 |
|    | WO <sub>3</sub> <sup>20</sup>                | <i>tP16</i> | 5.306<br>(0.6%)   |                  | 8.010<br>(2.1%)   |                |                  |                 | 5.310<br>(0.6%)   |                  | 8.041<br>(2.5%)   |                |                  |                 |
|    | WO <sub>3</sub>                              | <i>tP8</i>  | 5.341<br>(0.7%)   |                  | 4.004<br>(1.7%)   |                |                  |                 | 5.314<br>(0.2%)   |                  | 4.020<br>(2.2%)   |                |                  |                 |
|    | WO <sub>3</sub> <sup>21</sup>                | <i>hP12</i> | 7.444<br>(2.0%)   |                  | 3.821<br>(-2.0%)  |                |                  |                 | 7.417<br>(1.6%)   |                  | 3.809<br>(-2.3%)  |                |                  |                 |
| Mn | MnO                                          | <i>cF8</i>  | 3.150<br>(0.2%)   |                  | 15.162<br>(-1.6%) |                |                  |                 | 3.159<br>(0.5%)   |                  | 15.191<br>(-1.4%) |                |                  |                 |

|    |                                              |             |                   |                   |                   |  |                  |  |                   |                  |                   |  |                  |  |
|----|----------------------------------------------|-------------|-------------------|-------------------|-------------------|--|------------------|--|-------------------|------------------|-------------------|--|------------------|--|
|    | MnO                                          | <i>hP4</i>  | 3.440<br>(2.0%)   | 5.800<br>(−0.7%)  | 5.317<br>(−1.3%)  |  |                  |  | 3.430<br>(1.7%)   | 5.786<br>(−0.9%) | 5.392<br>(0.1%)   |  |                  |  |
|    | Mn <sub>2</sub> O <sub>3</sub>               | <i>oP80</i> | 9.366<br>(−0.5%)  | 9.419<br>(0.0%)   | 9.469<br>(0.5%)   |  |                  |  | 9.384<br>(−0.3%)  | 9.437<br>(0.2%)  | 9.493<br>(0.7%)   |  |                  |  |
|    | Mn <sub>2</sub> O <sub>3</sub>               | <i>cI80</i> | 9.436<br>(0.2%)   |                   |                   |  |                  |  | 9.452<br>(0.4%)   |                  |                   |  |                  |  |
|    | Mn <sub>3</sub> O <sub>4</sub>               | <i>tI28</i> | 5.777<br>(0.3%)   | 5.788<br>(0.5%)   | 9.409<br>(−0.5%)  |  |                  |  | 5.785<br>(0.4%)   | 5.796<br>(0.6%)  | 9.453<br>(−0.1%)  |  |                  |  |
|    | MnO <sub>2</sub>                             | <i>tI24</i> | 13.709<br>(−1.2%) | 2.862<br>(0.5%)   | 9.698<br>(−1.2%)  |  | 135.0<br>(0.0%)  |  | 13.728<br>(−1.1%) | 2.862<br>(0.5%)  | 9.705<br>(−1.1%)  |  | 135.0<br>(0.0%)  |  |
|    | MnO <sub>2</sub>                             | <i>oP12</i> | 2.863<br>(0.5%)   | 4.508<br>(1.2%)   | 9.237<br>(−0.9%)  |  |                  |  | 2.862<br>(0.5%)   | 4.543<br>(2.0%)  | 9.211<br>(−1.2%)  |  |                  |  |
|    | MnO <sub>2</sub>                             | <i>tP6</i>  | 6.177<br>(−0.8%)  | 6.177<br>(−0.8%)  | 2.877<br>(0.0%)   |  |                  |  | 6.187<br>(−0.7%)  | 6.187<br>(−0.7%) | 2.879<br>(0.1%)   |  |                  |  |
|    | MnO <sub>2</sub>                             | <i>cF48</i> | 5.702<br>(0.0%)   |                   | 8.031<br>(−0.4%)  |  |                  |  | 5.702<br>(0.0%)   |                  | 8.028<br>(−0.4%)  |  |                  |  |
|    | Mn <sub>2</sub> O <sub>7</sub>               | <i>mP72</i> | 6.926<br>(1.9%)   | 16.991<br>(1.8%)  | 9.434<br>(−0.2%)  |  | 100.5<br>(0.3%)  |  | 6.985<br>(2.8%)   | 17.504<br>(4.9%) | 9.598<br>(1.5%)   |  | 100.2<br>(0.0%)  |  |
| Tc | TcO <sub>2</sub>                             | <i>mP12</i> | 5.561<br>(1.4%)   | 4.608<br>(−3.1%)  | 5.571<br>(0.9%)   |  | 111.6<br>(−5.2%) |  | 5.565<br>(1.5%)   | 4.611<br>(−3.0%) | 5.575<br>(1.0%)   |  | 111.6<br>(−5.2%) |  |
|    | Tc <sub>2</sub> O <sub>7</sub>               | <i>oP36</i> | 13.683<br>(−0.5%) | 7.484<br>(0.6%)   | 5.694<br>(1.4%)   |  |                  |  | 13.852<br>(0.7%)  | 7.600<br>(2.2%)  | 5.762<br>(2.6%)   |  |                  |  |
| Re | ReO <sub>2</sub>                             | <i>mP12</i> | 5.576<br>(−0.1%)  | 4.872<br>(1.3%)   | 5.618<br>(0.7%)   |  | 118.3<br>(−2.1%) |  | 5.554<br>(−0.5%)  | 4.864<br>(1.1%)  | 5.606<br>(0.5%)   |  | 118.1<br>(−2.3%) |  |
|    | ReO <sub>2</sub>                             | <i>oP12</i> | 4.599<br>(0.0%)   | 4.866<br>(1.2%)   | 5.695<br>(0.9%)   |  |                  |  | 4.606<br>(0.1%)   | 4.836<br>(0.6%)  | 5.688<br>(0.8%)   |  |                  |  |
|    | ReO <sub>2</sub>                             | <i>tP6</i>  | 6.548<br>(−3.5%)  | 6.548<br>(−3.5%)  | 3.207<br>(14.2%)  |  |                  |  | 6.542<br>(−3.6%)  | 6.542<br>(−3.6%) | 3.197<br>(13.9%)  |  |                  |  |
|    | ReO <sub>3</sub> <sup>22</sup>               | <i>cP4</i>  | 3.765<br>(0.4%)   |                   |                   |  |                  |  | 3.758<br>(0.2%)   |                  |                   |  |                  |  |
|    | Re <sub>2</sub> O <sub>7</sub> <sup>23</sup> | <i>oP72</i> | 12.642<br>(1.1%)  | 15.176<br>(−0.1%) | 5.497<br>(0.9%)   |  |                  |  | 12.693<br>(1.5%)  | 15.443<br>(1.6%) | 5.531<br>(1.5%)   |  |                  |  |
| Fe | Fe <sub>3</sub> O <sub>4</sub>               | <i>cF56</i> | 8.390<br>(−0.1%)  |                   |                   |  |                  |  | 8.403<br>(0.0%)   |                  |                   |  |                  |  |
|    | Fe <sub>3</sub> O <sub>4</sub>               | <i>mP56</i> | 5.986<br>(0.7%)   | 5.946<br>(0.4%)   | 16.780<br>(0.0%)  |  | 90.0<br>(−0.3%)  |  | 5.983<br>(0.6%)   | 5.976<br>(0.9%)  | 16.810<br>(0.2%)  |  | 90.0<br>(−0.3%)  |  |
|    | Fe <sub>2</sub> O <sub>3</sub>               | <i>hR10</i> | 5.053<br>(0.3%)   |                   | 13.683<br>(−0.5%) |  |                  |  | 5.054<br>(0.4%)   |                  | 13.725<br>(−0.2%) |  |                  |  |
|    | Fe <sub>2</sub> O <sub>3</sub>               | <i>cI80</i> | 9.422<br>(0.2%)   | 9.393<br>(−0.1%)  | 9.436<br>(0.3%)   |  |                  |  | 9.422<br>(0.2%)   | 9.393<br>(−0.1%) | 9.437<br>(0.3%)   |  |                  |  |
|    | Fe <sub>2</sub> O <sub>3</sub>               | <i>oP40</i> | 5.095<br>(0.5%)   | 8.769<br>(0.4%)   | 9.514<br>(1.0%)   |  |                  |  | 5.100<br>(0.6%)   | 8.793<br>(0.6%)  | 9.524<br>(1.1%)   |  |                  |  |
| Ru | RuO <sub>2</sub>                             | <i>tP6</i>  | 6.384<br>(0.5%)   | 6.384<br>(0.5%)   | 3.118<br>(0.4%)   |  |                  |  | 6.384<br>(0.5%)   | 6.385<br>(0.5%)  | 3.122<br>(0.5%)   |  |                  |  |
|    | RuO <sub>4</sub>                             | <i>cP40</i> | 8.626<br>(1.4%)   |                   |                   |  |                  |  | 8.761<br>(3.0%)   |                  |                   |  |                  |  |

|    |                                              |             |                   |                  |                   |                |                  |                |                  |                  |                   |                |                  |                |
|----|----------------------------------------------|-------------|-------------------|------------------|-------------------|----------------|------------------|----------------|------------------|------------------|-------------------|----------------|------------------|----------------|
|    | RuO <sub>4</sub>                             | <i>mS20</i> | 9.362<br>(0.6%)   | 4.505<br>(2.5%)  | 8.542<br>(1.0%)   |                | 116.6<br>(−0.2%) |                | 9.562<br>(2.8%)  | 4.534<br>(3.1%)  | 8.673<br>(2.6%)   |                | 116.5<br>(−0.2%) |                |
| Os | OsO <sub>2</sub> <sup>24</sup>               | <i>tP6</i>  | 4.479<br>(−0.5%)  |                  | 3.209<br>(0.8%)   |                |                  |                | 4.474<br>(−0.6%) |                  | 3.211<br>(0.9%)   |                |                  |                |
|    | OsO <sub>4</sub>                             | <i>mS20</i> | 9.229<br>(−1.6)   | 4.476<br>(−0.9%) | 8.462<br>(−1.9%)  |                | 116.6<br>(0.0%)  |                | 9.514<br>(1.4%)  | 4.572<br>(1.3%)  | 8.632<br>(0.0%)   |                | 116.6<br>(−0.1%) |                |
| Co | CoO                                          | <i>cF8</i>  | 2.959<br>(−1.8%)  |                  | 14.903<br>(0.9%)  |                |                  |                | 3.021<br>(0.2%)  |                  | 14.714<br>(−0.4%) |                |                  |                |
|    | CoO                                          | <i>hP4</i>  | 3.278<br>(2.1%)   | 5.650<br>(1.6%)  | 5.172<br>(−1.3%)  |                |                  |                | 3.276<br>(2.0%)  | 5.650<br>(1.6%)  | 5.222<br>(−0.3%)  |                |                  |                |
|    | Co <sub>3</sub> O <sub>4</sub>               | <i>cF56</i> | 8.079<br>(−0.1%)  |                  |                   |                |                  |                | 8.090<br>(0.1%)  |                  |                   |                |                  |                |
| Rh | Rh <sub>2</sub> O <sub>3</sub> <sup>25</sup> | <i>hR10</i> | 5.128<br>(0.0%)   |                  | 13.903<br>(0.4%)  |                |                  |                | 5.138<br>(0.2%)  |                  | 13.862<br>(0.1%)  |                |                  |                |
|    | Rh <sub>2</sub> O <sub>3</sub> <sup>26</sup> | <i>oP40</i> | 5.146<br>(0.0%)   | 5.454<br>(0.2%)  | 14.717<br>(0.1%)  |                |                  |                | 5.153<br>(0.1%)  | 5.454<br>(0.2%)  | 14.726<br>(0.2%)  |                |                  |                |
|    | RhO <sub>2</sub>                             | <i>tP6</i>  | 4.494<br>(0.2%)   |                  | 3.097<br>(0.3%)   |                |                  |                | 4.495<br>(0.2%)  |                  | 3.104<br>(0.5%)   |                |                  |                |
| Ir | IrO <sub>2</sub>                             | <i>tP6</i>  | 6.367<br>(−0.1%)  | 6.367<br>(−0.1%) | 3.187<br>(0.9%)   |                |                  |                | 6.360<br>(−0.2%) | 6.360<br>(−0.2%) | 3.191<br>(1.0%)   |                |                  |                |
| Ni | NiO                                          | <i>cF8</i>  | 2.949<br>(−0.2%)  |                  | 14.403<br>(−0.5%) |                |                  |                | 2.963<br>(0.3%)  |                  | 14.482<br>(0.1%)  |                |                  |                |
| Pd | PdO <sup>27</sup>                            | <i>tP4</i>  | 3.061<br>(1.0%)   |                  | 5.327<br>(−0.1%)  |                |                  |                | 3.071<br>(1.4%)  |                  | 5.317<br>(−0.3%)  |                |                  |                |
| Pt | PtO <sup>28</sup>                            | <i>tP4</i>  | 3.136<br>(1.9%)   |                  | 5.284<br>(−1.0%)  |                |                  |                | 3.137<br>(1.9%)  |                  | 5.273<br>(−1.2%)  |                |                  |                |
|    | Pt <sub>3</sub> O <sub>4</sub> <sup>29</sup> | <i>cP14</i> | 5.620<br>(0.6%)   |                  |                   |                |                  |                | 5.612<br>(0.5%)  |                  |                   |                |                  |                |
|    | PtO <sub>2</sub> <sup>30</sup>               | <i>hP6</i>  | 3.133<br>(1.1%)   |                  | 8.703<br>(4.6%)   |                |                  |                | 3.119<br>(0.6%)  |                  | 9.023<br>(8.4%)   |                |                  |                |
|    | PtO <sub>2</sub> <sup>31</sup>               | <i>oP6</i>  | 4.536<br>(1.1%)   | 4.524<br>(−0.2%) | 3.162<br>(0.8%)   |                |                  |                | 4.544<br>(1.2%)  | 4.486<br>(−1.0%) | 3.158<br>(0.6%)   |                |                  |                |
| Cu | Cu <sub>2</sub> O <sup>32</sup>              | <i>cP6</i>  | 4.296<br>(0.6%)   |                  |                   |                |                  |                | 4.318<br>(1.1%)  |                  |                   |                |                  |                |
|    | CuO                                          | <i>mS8</i>  | 7.638<br>(2.0%)   | 3.334<br>(−2.8%) | 6.401<br>(0.5%)   | 90.0<br>(0.0%) | 94.15<br>(−1.3%) | 90.0<br>(0.0%) | 7.565<br>(1.1%)  | 3.423<br>(−0.2%) | 6.372<br>(0.1%)   | 90.0<br>(0.0%) | 94.8<br>(−0.7%)  | 90.0<br>(0.0%) |
|    | Cu <sub>4</sub> O <sub>3</sub>               | <i>tI28</i> | 5.817<br>(−0.3%)  | 5.817<br>(−0.3%) | 10.028<br>(1.0%)  |                |                  |                | 5.859<br>(0.4%)  | 5.859<br>(0.4%)  | 9.977<br>(0.5%)   |                |                  |                |
| Ag | Ag <sub>2</sub> O <sup>33</sup>              | <i>cP6</i>  | 4.742<br>(0.1%)   |                  |                   |                |                  |                | 4.771<br>(0.7%)  |                  |                   |                |                  |                |
|    | AgO <sup>34</sup>                            | <i>tI32</i> | 6.864<br>(0.5%)   |                  | 9.200<br>(0.9%)   |                |                  |                | 6.875<br>(0.6%)  |                  | 9.209<br>(1.0%)   |                |                  |                |
|    | Ag <sub>2</sub> O <sub>3</sub> <sup>35</sup> | <i>oF40</i> | 12.848<br>(−0.2%) | 10.522<br>(0.3%) | 3.728<br>(1.8%)   |                |                  |                | 12.872<br>(0.0%) | 10.556<br>(0.6%) | 3.713<br>(1.3%)   |                |                  |                |
|    | Ag <sub>6</sub> O <sub>2</sub> <sup>36</sup> | <i>hP8</i>  | 5.325<br>(0.1%)   |                  | 4.945<br>(−0.1%)  |                |                  |                | 5.356<br>(0.7%)  |                  | 4.925<br>(−0.5%)  |                |                  |                |



|    |                                              |             |                   |                   |                  |  |                 |  |                   |                  |                  |  |                  |  |
|----|----------------------------------------------|-------------|-------------------|-------------------|------------------|--|-----------------|--|-------------------|------------------|------------------|--|------------------|--|
|    | Ag <sub>3</sub> O <sub>4</sub>               | <i>mP14</i> | 3.621<br>(1.2%)   | 9.255<br>(0.5%)   | 5.709<br>(0.6%)  |  | 106.9<br>(0.7%) |  | 3.621<br>(1.2%)   | 9.255<br>(0.5%)  | 5.709<br>(0.6%)  |  | 106.9<br>(0.7%)  |  |
| Au | Au <sub>2</sub> O <sub>3</sub> <sup>37</sup> | <i>oF40</i> | 10.642<br>(1.2%)  | 12.917<br>(0.4%)  | 3.883<br>(1.2%)  |  |                 |  | 10.611<br>(0.9%)  | 12.923<br>(0.4%) | 3.858<br>(0.5%)  |  |                  |  |
| Zn | ZnO <sup>38</sup>                            | <i>hP4</i>  | 3.256<br>(0.2%)   |                   | 5.183<br>(-0.5%) |  |                 |  | 3.267<br>(0.5%)   |                  | 5.207<br>(0.0%)  |  |                  |  |
|    | ZnO <sub>2</sub> <sup>39</sup>               | <i>cP12</i> | 4.872<br>(0.0%)   |                   |                  |  |                 |  | 4.894<br>(0.5%)   |                  |                  |  |                  |  |
| Cd | CdO <sup>40</sup>                            | <i>cF8</i>  | 4.691<br>(-0.1%)  |                   |                  |  |                 |  | 4.688<br>(-0.1%)  |                  |                  |  |                  |  |
|    | CdO <sub>2</sub> <sup>41</sup>               | <i>cP12</i> | 5.298<br>(-0.3%)  |                   |                  |  |                 |  | 5.301<br>(-0.2%)  |                  |                  |  |                  |  |
| Hg | HgO <sup>42</sup>                            | <i>oP8</i>  | 6.676<br>(1.0%)   | 5.300<br>(-4.0%)  | 3.462<br>(-1.7%) |  |                 |  | 6.702<br>(1.3%)   | 5.536<br>(0.3%)  | 3.551<br>(0.8%)  |  |                  |  |
|    | HgO <sup>43</sup>                            | <i>hP6</i>  | 3.515<br>(-1.6%)  |                   | 8.566<br>(-1.2%) |  |                 |  | 3.610<br>(1.1%)   |                  | 8.704<br>(0.4%)  |  |                  |  |
|    | HgO <sub>2</sub>                             | <i>mS6</i>  | 4.571<br>(2.3%)   | 4.734<br>(-13.3%) | 4.070<br>(15.7%) |  | 111.7<br>(3.0%) |  | 6.076<br>(35.9%)  | 4.066<br>(-25.5) | 4.592<br>(30.5%) |  | 127.1<br>(17.2%) |  |
|    | HgO <sub>2</sub>                             | <i>oP12</i> | 5.445<br>(-10.4%) | 5.449<br>(-9.3%)  | 5.434<br>(13.2%) |  |                 |  | 5.471<br>(-10.0%) | 5.472<br>(-9.0%) | 5.465<br>(13.8%) |  |                  |  |

<sup>a</sup> Literature citations are given here for the oxides that are not discussed in detail in the main paper.

<sup>b</sup> Non-magnetic experimental lattice parameters have been transformed so that they correspond to the unit cell used in the spin-polarized calculations. Differences to the experimental values are reported for the magnetic unit cell.

**Table S3.** Energy comparisons of different magnetic configurations for the paramagnetic binary *d*-metal oxides (DFT-PBE0/SVP level of theory).

| Oxide                                                 | Pearson symbol | Magnetic configuration <sup>b</sup> | Relative energy (kJ mol <sup>-1</sup> per atom) |
|-------------------------------------------------------|----------------|-------------------------------------|-------------------------------------------------|
| Ti <sub>2</sub> O <sub>3</sub> <sup>a</sup>           | <i>hR10</i>    | DM                                  | 6.8                                             |
|                                                       |                | FM                                  | 12.4                                            |
|                                                       |                | <b>AFM</b>                          | <b>0.0</b>                                      |
| $\alpha$ -Ti <sub>3</sub> O <sub>5</sub> <sup>a</sup> | <i>oS32</i>    | DM                                  | 9.0                                             |
|                                                       |                | FM                                  | 2.0                                             |
|                                                       |                | FiM                                 | 2.3                                             |
|                                                       |                | <b>AFM</b>                          | <b>0.0</b>                                      |
| $\gamma$ -Ti <sub>3</sub> O <sub>5</sub> <sup>a</sup> | <i>mS32</i>    | DM                                  | 9.7                                             |
|                                                       |                | FM                                  | 3.7                                             |
|                                                       |                | FiM                                 | 3.4                                             |
|                                                       |                | <b>AFM</b>                          | <b>0.0</b>                                      |
| $\delta$ -Ti <sub>3</sub> O <sub>5</sub> <sup>a</sup> | <i>mS32</i>    | DM                                  | 8.7                                             |
|                                                       |                | FM                                  | 0.4                                             |
|                                                       |                | FiM                                 | 0.1                                             |
|                                                       |                | <b>AFM</b>                          | <b>0.0</b>                                      |
| VO <sub>2</sub>                                       | <i>mP12</i>    | DM                                  | 14.9                                            |
|                                                       |                | FM                                  | 14.0                                            |
|                                                       |                | <b>AFM</b>                          | <b>0.0</b>                                      |
| VO <sub>2</sub>                                       | <i>mS12</i>    | DM                                  | 26.4                                            |
|                                                       |                | FM                                  | 7.0                                             |
|                                                       |                | <b>AFM</b>                          | <b>0.0</b>                                      |
| VO <sub>2</sub>                                       | <i>tP6</i>     | DM                                  | 28.4                                            |
|                                                       |                | FM                                  | 18.8                                            |
|                                                       |                | <b>AFM</b>                          | <b>0.0</b>                                      |
| NbO <sub>2</sub>                                      | <i>tP6</i>     | <b>DM</b>                           | <b>0.0</b>                                      |
|                                                       |                | FM                                  | 1.8                                             |
|                                                       |                | AFM                                 | 0.0                                             |
|                                                       | <i>tI96</i>    | <b>DM</b>                           | <b>0.0</b>                                      |
|                                                       |                | FM                                  | 5.9                                             |
|                                                       |                | AFM                                 | 8.3                                             |
| MoO <sub>2</sub>                                      | <i>mP12</i>    | DM                                  | 3.5                                             |
|                                                       |                | FM                                  | 3.7                                             |
|                                                       |                | <b>AFM</b>                          | <b>0.0</b>                                      |
| Mn <sub>2</sub> O <sub>3</sub>                        | <i>cI80</i>    | DM                                  | 132.5                                           |
|                                                       |                | <b>FM</b>                           | <b>0.0</b>                                      |
|                                                       |                | FiM                                 | 2.2                                             |
| TcO <sub>2</sub>                                      | <i>mP12</i>    | DM                                  | 28.1                                            |
|                                                       |                | FM                                  | 28.2                                            |
|                                                       |                | <b>AFM</b>                          | <b>0.0</b>                                      |
| ReO <sub>2</sub>                                      | <i>mP12</i>    | DM                                  | 16.5                                            |
|                                                       |                | FM                                  | 38.8                                            |
|                                                       |                | <b>AFM</b>                          | <b>0.0</b>                                      |
| ReO <sub>2</sub>                                      | <i>oP12</i>    | DM                                  | 7.4                                             |
|                                                       |                | FM                                  | 8.6                                             |
|                                                       |                | <b>AFM</b>                          | <b>0.0</b>                                      |
| ReO <sub>2</sub>                                      | <i>tP6</i>     | DM                                  | 25.0                                            |
|                                                       |                | FM                                  | 5.1                                             |
|                                                       |                | <b>AFM</b>                          | <b>0.0</b>                                      |
| RuO <sub>2</sub>                                      | <i>tP6</i>     | DM                                  | 11.5                                            |
|                                                       |                | FM                                  | 16.5                                            |
|                                                       |                | <b>AFM</b>                          | <b>0.0</b>                                      |
| RhO <sub>2</sub>                                      | <i>tP6</i>     | DM                                  | 11.6                                            |
|                                                       |                | <b>FM</b>                           | <b>0.0</b>                                      |
|                                                       |                | AFM                                 | 1.9                                             |
| IrO <sub>2</sub>                                      | <i>tP6</i>     | DM                                  | 7.2                                             |
|                                                       |                | <b>AFM</b>                          | <b>0.0</b>                                      |
|                                                       |                | FM                                  | 0.1                                             |
| Ag <sub>3</sub> O <sub>4</sub>                        | <i>mP14</i>    | DM                                  | 2.8                                             |
|                                                       |                | <b>FM</b>                           | <b>0.0</b>                                      |
|                                                       |                | FiM                                 | 2.7                                             |
|                                                       |                | AFM                                 | 2.7                                             |

<sup>a</sup> Magnetic ground state of the structure is not known from the experiment.

<sup>b</sup> Diamagnetic (DM), ferromagnetic (FM), ferrimagnetic (FiM), or antiferromagnetic (AFM) configuration.

## References

- (1) Knop, O.; Hartley, J. M. Refinement of the Crystal Structure of Scandium Oxide. *Can. J. Chem.* **1968**, *46*, 1446–1450.
- (2) Maslen, E. N.; Streltsov, V. A.; Ishi. A Synchrotron X-Ray Study of the Electron Density in C-Type Rare Earth Oxides. *Acta Cryst.* **1996**, *B52*, 414–422.
- (3) Felsche, J. A New Form of La<sub>2</sub>O<sub>3</sub>. *Kurze Orig.* **1969**, 212.
- (4) Aldebert, P.; Traverse, J. P. Etude Par Diffraction Neutronique Des Structures De Haute Temperature De La<sub>2</sub>O<sub>3</sub> et Nd<sub>2</sub>O<sub>3</sub>. *Mat. Res. Bull.* **1979**, *14*, 303–323.
- (5) Amano, S.; Bogdanovski, D.; Yamane, H.; Terauchi, M.; Dronskowski, R.  $\epsilon$ -TiO, a Novel Stable Polymorph of Titanium Monoxide. *Angew. Chemie - Int. Ed.* **2016**, *55* (5), 1652–1657.
- (6) Burdett, J. K.; Hughbanks, T.; Miller, G. J.; Smith, J. V.; Richardson, J. W. Structural-Electronic Relationships in Inorganic Solids: Powder Neutron Diffraction Studies of the Rutile and Anatase Polymorphs of Titanium Dioxide at 15 and 295 K. *J. Am. Chem. Soc.* **1987**, *109* (12), 3639–3646.
- (7) Howard, C. J.; Sabine, T. M.; Dickson, F. Structural and Thermal Parameters for Rutile and Anatase. *Acta Crystallogr. Sect. B* **1991**, *47* (4), 462–468.
- (8) Meagher, E. P.; Lager, G. A. Polyhedral Thermal Expansion in the TiO<sub>2</sub> Polymorphs: Refinement of the Crystal Structures of Rutile and Brookite at High Temperature. *Can. Mineral.* **1979**, *17*, 77–85.
- (9) Gualtieri, A.; Norby, P. Rietveld Refinement Using Synchrotron X-Ray Powder Diffraction Data Collected in Transmission Geometry Using an Imaging-Plate Detector: Application to Standard M-. *J. Appl. Crystallogr.* **1996**, *29*, 707–713.
- (10) Teufer, G. The Crystal Structure of Tetragonal ZrO<sub>2</sub>. *Acta Crystallogr.* **1962**, *15* (11), 1187.
- (11) Ruh, R.; Corfield, P. W. R. Crystal Structure of Monoclinic Hafnia and Comparison with Monoclinic Zirconia. *J. Am. Ceram. Soc.* **1970**, *53* (3), 126–129.
- (12) Enjalbert, R.; Galy, J. A Refinement of the Structure of V<sub>2</sub>O<sub>5</sub>. *Acta Cryst.* **1986**, *C42*, 1467–1469.
- (13) Cocciantelli, J. M.; Gravereau, P.; Doumerc, J. P.; Puchard, M.; Hagenmuller, P. On the Preparation and Characterization of a New Polymorph of V<sub>2</sub>O<sub>5</sub>. *J. Solid State Chem.* **1991**, *93*, 497–502.
- (14) Bowman, A. L.; Wallace, T. C.; Yarnell, J. L.; Wenzel, R. G. The Crystal Structure of Niobium Monoxide. *Acta Crystallogr.* **1966**, *21* (5), 843–843.
- (15) Bolzan, A. A.; Fong, C.; Kennedy, B. J. A Powder Neutron Diffraction Study of Semiconducting and Metallic Niobium Dioxide. *J. Solid State Chem.* **1994**, *113*, 9–14.
- (16) Ercit, S. Verfeinerung Der Struktur Des  $\zeta$ -Nb<sub>2</sub>O<sub>5</sub> Und Deren Beziehungen Zu Den Strukturen Des Rutils Und Thoreauliths. *Mineral. Petrol.* **1991**, *43*, 217–223.
- (17) Hollerweger, R.; Holec, D.; Paulitsch, J.; Bartosik, M.; Daniel, R.; Rachbauer, R.; Polcik, P.; Keckes, J.; Krywka, C.; Euchner, H.; et al. Complementary Ab Initio and X-Ray Nanodiffraction Studies of Ta<sub>2</sub>O<sub>5</sub>. *Acta Mater.* **2015**, *83*, 276–284.
- (18) Woodward, P. M.; Sleight, A. W.; Vogt, T. Ferroelectric Tungsten Trioxide. *J. Solid State Chem.* **1997**, *131* (1), 9–17.
- (19) Woodward, P. M.; Sleight, A. W.; Vogt, T. Structure Refinement of Triclinic Tungsten Trioxide. *J. Phys. Chem. Solids* **1995**, *56* (10), 1305–1315.
- (20) Vogt, T.; Woodward, P. M.; Hunter, B. A. The High-Temperature Phases of WO<sub>3</sub>. *J. Solid State Chem.* **1999**, *144* (1), 209–215.
- (21) Gerand, B.; Nowogrocki, G.; Guenot, J.; Figlarz, M. Structural Study of a New Hexagonal Form of Tungsten Trioxide. *J. Solid State Chem.* **1979**, *29*, 429–434.
- (22) Jorgensen, J. E.; Jorgensen, J.; Batlogg, B.; Remeika, J.; Axe, J. Order Parameter and Critical Exponent for the Pressure-Induced Phase Transitions in ReO<sub>3</sub>. *Phys. Rev. B* **1986**, *33* (7), 4793–4798.
- (23) Krebs, B.; Muller, A.; Beyer, H. H. Crystal Structure of Rhenium (7) Oxide. *Inorg. Chem.* **1969**, *8* (3), 436–443.
- (24) Boman, C.-E.; Danielsen, J.; Haaland, A.; Jerslev, B.; Schäffer, C. E.; Sunde, E.; Sørensen, N. A. Precision Determination of the Crystal Structure of Osmium Dioxide. *Acta Chemica Scandinavica*. 1970, pp 123–128.
- (25) Coey, J. M. D. The Crystal Structure of Rh<sub>2</sub>O<sub>3</sub>. *Acta Crystallogr. Sect. B Struct. Crystallogr. Cryst. Chem.* **1970**, *26* (11), 1876–1877.
- (26) Biesterbos, J. W. M.; Hornstra, J. The Crystal Structure of the High-Temperature, Low-Pressure Foem of Rh<sub>2</sub>O<sub>3</sub>. *J. Less-Common Met.* **1973**, *30*, 121–125.
- (27) Waser, J.; Levy, H. A.; Peterson, S. W. The Structure of PdO. *Acta Crystallogr.* **1953**, *6* (7), 661–663.
- (28) Moore, W. J.; Pauling, L. The Crystal Structures of the Tetragonal Monoxides of Lead, Tin, Palladium, and Platinum. *J. Am. Chem. Soc.* **1941**, *63* (5), 1392–1394.
- (29) Muller, O.; Roy, R. Formation and Stability of the Platinum and Rhodium Oxides at High Oxygen Pressures and the Structures of Pt<sub>3</sub>O<sub>4</sub>, b-PtO<sub>2</sub> and RhO<sub>2</sub>. *Journals Less-Common Met.* **1968**, *16*, 129–146.
- (30) Hoekstra, H. R.; Siegel, S.; Gallagher, F. x. *Reaction of Platinum Dioxide with Some Metal Oxides*; American Chemical Society: Washington, DC, 1971.
- (31) Siegel, S.; Hoekstra, H. R.; Tani, B. S. The Crystal Structure of Beta-Platinum Dioxide. *J. Inorg. Nucl. Chem.* **1969**, *31*, 3803–3807.
- (32) Restori, R.; Schwarzenbach, D. Charge Density in Cuprite, Cu<sub>2</sub>O. *Acta Crystallogr. Sect. B Struct. Crystallogr. Cryst. Chem.* **1986**, *B42*, 201–208.
- (33) Srivastava, S. P.; Srivastava, R. C.; Pandey, S. D. Thermal Expansion of Ag<sub>2</sub>O. *J. Phys. Chem. C* **1977**, *43*, 1463–1464.
- (34) Yvon, K.; Bezing, A. Structure and Magnetic Properties of Tetragonal Silver(I,III) Oxide, AgO. *J. Solid State Chem.* **1986**, *65*, 225–230.
- (35) Standke, B.; Jansen, M. Ag<sub>2</sub>O<sub>3</sub>, a Novel Binary Oxide. *Angew. Chem. Intl. Ed. Engl.* **1985**, *24*, 118–119.
- (36) Beesk, W.; Jones, P. G.; Rumpel, H.; Schwarzmann, E.; Sheldrick, G. M. X-Ray Crystal Structure of Ag<sub>6</sub>O<sub>2</sub>. *J.C.S. Chem. Comm.* **1981**, *166*, 664–665.
- (37) Jones, P. G.; Rumpel, H.; Schwarzmann, E.; Sheldrick, G. M.; Paulus, H. Gold (III) Oxide. *Acta Cryst.* **1979**, *B35*, 1435–1437.
- (38) Abrahams, S. C.; Bernstein, J. L. Remeasurement of the Structure of Hexagonal ZnO. *Acta Crystallogr. Sect. B Struct. Crystallogr. Cryst. Chem.* **1969**, *25* (7), 1233–1236.
- (39) Pusej, M.; Ban, Z.; Morvaj, J. On the Peroxides of Zinc and Cadmium. *Croat. Chem. Acta* **1985**, *58* (3), 283–288.
- (40) Cimino, A.; Marezio, M. Lattice Parameter and Defect Structure of Cadmium Oxide Containing Foreign Atoms. *J. Phys. Chem. Solids* **1960**, *17*, 57–64.
- (41) Hoffman, C. W. W.; Ropp, R. C.; Mooney, R. W. Preparation, Properties and Structure of Cadmium Peroxide. *J. Am. Chem. Soc.* **1959**, *81* (15), 3830–3834.
- (42) Aurivillius, K. Least-Squares Refinement of the Crystal Structures of Orthorhombic HgO and of Hg<sub>2</sub>O<sub>2</sub>NaI. *Acta Chem. Scand.* **1964**, *18*, 1305–1306.
- (43) Laruelle, P. Sur Le Polymorphisme de l'oxyde Mercurique. *Compt. Rend.* **1955**, *241*, 802–805.
